# Supplementary material
Source: ML conference proceedings conference paper supplement (https://openaccess.thecvf.com/content/CVPR2025/html/Miao_Noise_Diffusion_for_CVPR_2025_paper.html)
Supplement: Supplementary file 1 [file Miao_Noise_Diffusion_for_CVPR_2025_supplemental.pdf]

# Noise Diffusion for Enhancing Semantic Faithfulness in Text-to-Image Synthesis

## Supplementary Material

### A. Theoretical Analysis

In this section, we present the proof of the inequality  $\|\nabla_{\xi}^2 s(\xi)\|_2 \stackrel{a.e.}{\leq} c$ . First, we prove that this inequality holds within the domain of the function  $s(\cdot)$ . Then, we prove that the region where the derivatives of the function are undefined forms a set of zero measure, which guarantees the effectiveness of our method.

**Proof of the inequality.** Considering a neural network  $f(\cdot)$  with the following structure:

$$f(x) = g_k(\omega_k \cdots g_1(\omega_1 x + b_1) + b_2 \cdots + b_k), \quad (1)$$

where  $x$  is the input,  $g_i(\cdot)$  is the activation function for the  $i$ -th layer,  $\omega_i$  is the weight matrix, and  $b_i$  is the bias vector for the  $i$ -th layer. Using the chain rule, the first derivative of  $f(x)$  can be expressed by:

$$f'(x) = \frac{\partial g_k}{\partial z_k} \cdot \frac{\partial z_k}{\partial x}, \quad (2)$$

where  $z_k = \omega_k g_{k-1}(z_{k-1}) + b_k$ . The second derivative is given by:

$$f''(x) = \frac{\partial^2 g_k}{\partial z_k^2} \cdot \left( \frac{\partial z_k}{\partial x} \right)^2 + \frac{\partial g_k}{\partial z_k} \cdot \frac{\partial^2 z_k}{\partial x^2}. \quad (3)$$

The complexity of the derivative mainly comes from the activation functions, as the first derivative of a linear function is constant and its second derivative is zero. Table. 1 presents the bounds of the first and second derivatives for basic activation functions widely used in neural networks. For smooth functions, both their first and second derivatives are bounded over the entire domain. For non-smooth activation functions, their first and second derivatives are bounded within the domain where they are defined. Let  $\mathbf{R}$  represent the entire space and define the domain of the second derivative of  $f$  as follows:

$$\text{dom}(g'') = \text{dom}(g_1'') \cap \text{dom}(g_2'') \cap \cdots \cap \text{dom}(g_k''). \quad (4)$$

Therefore, for any given  $z \in \text{dom}(g'')$ , we have the following bounds:

$$\|g_i'(z)\|_2 \leq M_i, \quad \|g_i''(z)\|_2 \leq C_i, \quad \|\omega_i\|_2 \leq W_i, \quad (5)$$

where  $M_i, C_i, W_i, i = 1, \dots, k$ , are positive constants. The first derivative of  $z_k$  with respect to  $x$  in terms of  $z_{k-1}$  can be expressed as:

$$\frac{\partial z_k}{\partial x} = \omega_k \cdot \text{diag}(g_{k-1}'(z_{k-1})) \cdot \frac{\partial z_{k-1}}{\partial x}. \quad (6)$$

And the second derivative of  $z_k$  with respect to  $x$  in terms of  $z_{k-1}$  can be expressed as:

$$\begin{aligned} \frac{\partial^2 z_k}{\partial x^2} = & \omega_k \cdot \left[ \text{diag}(g_{k-1}''(z_{k-1})) \cdot \left( \frac{\partial z_{k-1}}{\partial x} \right)^2 \right] \\ & + \omega_k \cdot \left[ \text{diag}(g_{k-1}'(z_{k-1})) \cdot \frac{\partial^2 z_{k-1}}{\partial x^2} \right]. \end{aligned} \quad (7)$$

Now we use the recursive method to prove that  $f''$  is bounded. For the derivative at the first layer:

$$\left\| \frac{\partial z_1}{\partial x} \right\|_2 = \|\omega_1\|_2 \leq W_1, \quad \left\| \frac{\partial^2 z_1}{\partial x^2} \right\|_2 = 0. \quad (8)$$

Assume that for  $z_{i-1}$ , its first and second derivatives are bounded:

$$\left\| \frac{\partial z_{i-1}}{\partial x} \right\|_2 \leq U_{i-1}, \quad \left\| \frac{\partial^2 z_{i-1}}{\partial x^2} \right\|_2 \leq V_{i-1}. \quad (9)$$

Then the first derivative of the  $i$ -th layer satisfies:

$$\begin{aligned} \left\| \frac{\partial z_i}{\partial x} \right\|_2 & \leq \|\omega_i\|_2 \cdot \|g_{i-1}'(z_{i-1})\|_2 \cdot \left\| \frac{\partial z_{i-1}}{\partial x} \right\|_2 \\ & = W_i \cdot M_{i-1} \cdot U_{i-1}. \end{aligned} \quad (10)$$

The second derivative also satisfies:

$$\begin{aligned} \left\| \frac{\partial^2 z_i}{\partial x^2} \right\|_2 & \leq \|\omega_i\|_2 \cdot \|g_{i-1}''(z_{i-1})\|_2 \cdot \left\| \frac{\partial z_{i-1}}{\partial x} \right\|_2^2 \\ & \quad + \|\omega_i\|_2 \cdot \|g_{i-1}'(z_{i-1})\|_2 \cdot \left\| \frac{\partial^2 z_{i-1}}{\partial x^2} \right\|_2 \\ & = W_i \cdot (C_{i-1} \cdot U_{i-1}^2 + M_{i-1} \cdot V_{i-1}). \end{aligned} \quad (11)$$

Let

$$\begin{aligned} U_i & = W_i \cdot M_{i-1} \cdot U_{i-1}, \\ V_i & = W_i \cdot (C_{i-1} \cdot U_{i-1}^2 + M_{i-1} \cdot V_{i-1}), \end{aligned} \quad (12)$$

then we have:

$$\left\| \frac{\partial z_i}{\partial x} \right\|_2 \leq U_i, \quad \left\| \frac{\partial^2 z_i}{\partial x^2} \right\|_2 \leq V_i. \quad (13)$$

In this way we have proven that  $f''(x)$  is bounded within its domain  $\text{dom}(g'')$ .

**Proof that the inequality holds almost everywhere.** Let  $\mu(\cdot)$  denote the measure of sets, then we need to prove  $\mu(\text{dom}(g'')) = \mu(\mathbf{R})$ . Reviewing those non-smooth activation functions, their derivatives are only undefined at specific points, and the set of such points is very sparse in

| Activation Function | Mathematical Form                                             | First Order Derivative Properties                  | Second Order Derivative Properties          |
|---------------------|---------------------------------------------------------------|----------------------------------------------------|---------------------------------------------|
| ReLU                | $g(x) = \max(0, x)$                                           | $g'(x) = 1 \cdot I(x > 0) + 0 \cdot I(x < 0)$      | $g''(x) = 0$ (except at $x = 0$ )           |
| Sigmoid             | $g(x) = \frac{1}{1+e^{-x}}$                                   | $ g'(x)  \leq \frac{1}{4}$                         | $ g''(x)  \leq \frac{1}{4}$                 |
| Tanh                | $g(x) = \frac{e^x - e^{-x}}{e^x + e^{-x}}$                    | $ g'(x)  \leq 1$                                   | $ g''(x)  \leq 2$                           |
| Leaky ReLU          | $g(x) = x \cdot I(x > 0) + \alpha x \cdot I(x \leq 0)$        | $g'(x) = 1 \cdot I(x > 0) + \alpha \cdot I(x < 0)$ | $g''(x) = 0$ (except at $x = 0$ )           |
| Swish               | $g(x) = x \cdot \frac{1}{1+e^{-x}}$                           | $ g'(x)  < 2$                                      | $ g''(x)  < 2$                              |
| ELU                 | $g(x) = x \cdot I(x > 0) + \alpha(e^x - 1) \cdot I(x \leq 0)$ | $ g'(x)  \leq \max(0, \alpha)$                     | $g''(x) \leq  \alpha $ (except at $x = 0$ ) |
| GELU                | $g(x) = x \cdot \Phi(x)$                                      | $ g'(x)  \leq 1$                                   | $ g''(x)  \leq 0.5$                         |
| Mish                | $g(x) = x \cdot \tanh(\ln(1 + e^x))$                          | $ g'(x)  \leq 1.5$                                 | $ g''(x)  \leq 2$                           |
| Softplus            | $g(x) = \ln(1 + e^x)$                                         | $ g'(x)  \leq 1$                                   | $ g''(x)  \leq \frac{1}{4}$                 |
| Softmax             | $g_i(x) = \frac{e^{x_i}}{\sum_j e^{x_j}}$                     | $ g'_i(x)  \leq 1$                                 | $ g''_i(x)  \leq 1$                         |

Table 1. Properties of commonly used activation functions and their first and second derivatives.

high-dimensional space. Take ReLU as an example. The points where its derivative is not defined occur only when the input is zero or when the input is mapped to zero after a linear transformation. Given that the weights in neural networks are typically close to full rank, the set of inputs where ReLU’s derivative is undefined forms a lower-dimensional manifold, which is sparse in high-dimensional space. Consequently, the measure of this set is zero. Therefore  $\mu(\mathcal{R} \setminus \text{dom}(g''_i)) = 0$ ,  $i = 1, \dots, k$ . Since

$$\mathbf{R} \setminus \text{dom}(g'') = (\mathbf{R} \setminus \text{dom}(g''_1)) \cup \dots \cup (\mathbf{R} \setminus \text{dom}(g''_k)), \quad (14)$$

then we can obtain that

$$\mu(\mathbf{R} \setminus \text{dom}(g'')) \leq \mu(\mathbf{R} \setminus \text{dom}(g''_1)) + \dots + \mu(\mathbf{R} \setminus \text{dom}(g''_k)) = 0. \quad (15)$$

Therefore, we can conclude that the region where  $f''$  is undefined forms a set of measure zero, and the inequality for  $f''$  is satisfied almost everywhere. Therefore, the function  $s(\cdot)$  used to compute the score of latent variables in this paper also satisfies this condition, meaning that there exists a constant  $c$  so that for any  $\xi$  in the Gaussian space, we have  $\|\nabla_{\xi}^2 s(\xi)\|_2 \leq c$  almost everywhere.

## B. Hyper-parameters

### B.1. Number of Denoising Timesteps

To investigate the impact of the number of denoising timesteps  $T$ . We select the cases of  $T = 10, 20, 50, 80, 100$  and use the prompt “an apple and a pear” as an example, conducting the experiment with 25 random seeds. The quantitative results are shown in Fig. 1. Regardless of the number of timesteps, our method consistently leads to significant improvements. Generally speaking, increasing the number of timesteps can enhance the VQA score of the initial images; however, the VQA score after increasing the timesteps still leaves room for improvement. Fig. 2 shows an extreme example: increasing  $T$  from 10 to 100 does not result in a substantial change in the image content. In contrast, after optimizing the noisy latent variable, the generated images have a significant improvement in alignment

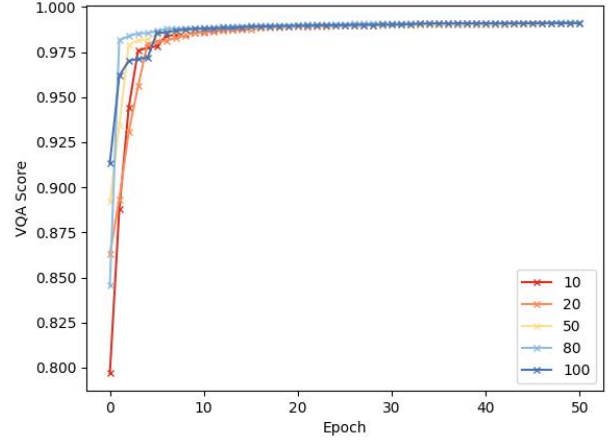

Figure 1. The average VQA score of the generated images across different epochs under various settings of the number of denoising timesteps.

with the prompt across different settings. This demonstrates that our method enhances the faithfulness across different numbers of timesteps. When it comes to the choice of  $T$ , selecting smaller values can significantly speed up inference time while still yielding satisfactory images. If speed is the primary concern, one could opt for  $T = 20$  or even  $T = 10$ . However, to balance stability with performance,  $T = 50$  is a recommended choice based on the current performance of diffusion models.

### B.2. Number of Candidate Noises

The number of candidate noises  $N$  should be large enough to ensure that the optimization progresses in the direction of increasing the VQA score. Since the latent variable exists in a high-dimensional space, it is unlikely to find a noise that leads to the step difference perfectly aligning with the gradient through random sampling. Instead, the criterion for setting  $N$  is to ensure that the lower bound is sufficiently large. We set  $N$  to different values: 10, 20, 50, 80 and 100, and observe the statistical characteristics of  $\nabla_{z_T} s(z_T)v/\|v\|_2^2$  under these settings. As shown in Fig. 3, when  $N$  increases from 10 to 20, the lower quartile (Q1) im-

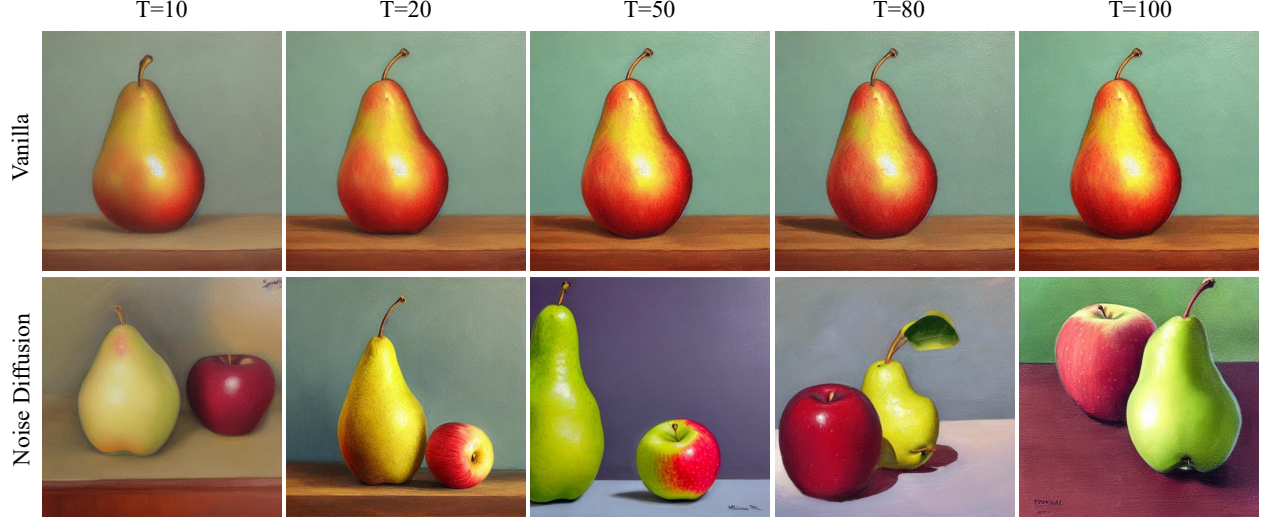

Figure 2. An example of an extreme case. Increasing the number of denoising timesteps does not lead to an improvement in the alignment of the generated image with the prompt. However, under different settings of the number of timesteps, our method consistently enhances the faithfulness.

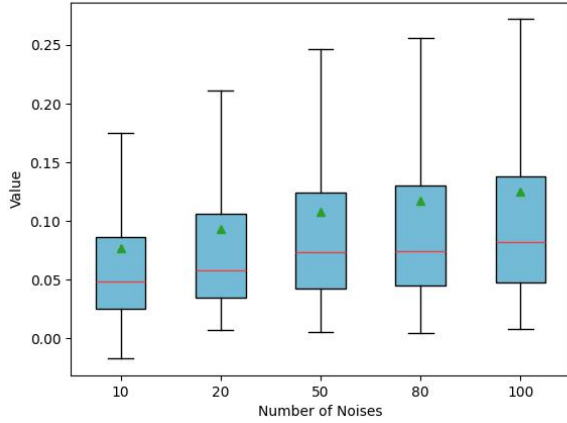

Figure 3. The statistical characteristics of  $\nabla_{z_T} s(z_T) v / \|v\|_2^2$  with different values of  $N$  during the optimization.

proves from 0.026 to 0.035. When  $N$  reaches 50, it further increases to 0.043, demonstrating the effect of increasing the number of candidate noises. As  $N$  increases to 100, Q1 reaches 0.048. Although the rate of improvement begins to slow down, increasing  $N$  further will still lead to continued growth. Therefore, although we set  $N$  as 50 in our experiments, increasing  $N$  undoubtedly has a positive effect on the optimization.

### C. Datasets

We present the prompt datasets used in our main experiment. Table. 2 shows the dataset for simple cases, which includes a total of 276 prompts, categorized into three groups: animals, animals-objects, and objects. The complex cases

are shown in Table. 3, where we have a total of 100 prompts, which similarly include animals, animals-objects and objects, but with additional spatial relationships such as “on,” “under,” “above,” and “below.” These added relationships increase the complexity of the prompts, forcing text-to-image models to better understand and reflect the logical structure within the prompts.

### D. More Results

We present additional results for vanilla settings and our method on SD V-1.4, V-1.5, V-2.0 and V-2.1 in Fig. 4, Fig. 5, Fig. 6 and Fig. 7, respectively.

|                                                                                                                                                                                                                                                                                                                                                                                                                                                                                                                                                                                                                                                                                                                                                                                                                                                                                                                                                                                                                                                                                                                                                                                                                                                                                                                                                          |                                                                                                                                                                                                                                                                                                                                                                                                                                                                                                                                                                                                                                                                                                                                                                                                                                                                                                                                                                                                                                                                                                                                                                                                                                                                                                                                                 |                                                                                                                                                                                                                                                                                                                                                                                                                                                                                                                                                                                                                                                                                                                                                                                                                                                                                                                                                                                                                                                                                                                                                                                                                                                                                                                                       |                                                                                                                                                                                                                                                                                                                                                                                                                                                                                                                                                                                                                                                                                                                                                                                                                                                                                                                                                                                                                                                                                                                                                                                                                                                                                                                                                     |                                                                                                                                                                                                                                                                                                                                                                                                                                                                                                                                                                                                                                                                                                                                                                                                                                                                                                                                                                                                                                                                                                                                                                                                                                                                                                                                                                          |                                                                                                                                                                                                                                                                                                                                                                                                                                                                                                                                                                                                                                                                                                                                                                                                                                                                                                                                                                                                                                                                                                                                                                                                                                                                                                                                                         |
|----------------------------------------------------------------------------------------------------------------------------------------------------------------------------------------------------------------------------------------------------------------------------------------------------------------------------------------------------------------------------------------------------------------------------------------------------------------------------------------------------------------------------------------------------------------------------------------------------------------------------------------------------------------------------------------------------------------------------------------------------------------------------------------------------------------------------------------------------------------------------------------------------------------------------------------------------------------------------------------------------------------------------------------------------------------------------------------------------------------------------------------------------------------------------------------------------------------------------------------------------------------------------------------------------------------------------------------------------------|-------------------------------------------------------------------------------------------------------------------------------------------------------------------------------------------------------------------------------------------------------------------------------------------------------------------------------------------------------------------------------------------------------------------------------------------------------------------------------------------------------------------------------------------------------------------------------------------------------------------------------------------------------------------------------------------------------------------------------------------------------------------------------------------------------------------------------------------------------------------------------------------------------------------------------------------------------------------------------------------------------------------------------------------------------------------------------------------------------------------------------------------------------------------------------------------------------------------------------------------------------------------------------------------------------------------------------------------------|---------------------------------------------------------------------------------------------------------------------------------------------------------------------------------------------------------------------------------------------------------------------------------------------------------------------------------------------------------------------------------------------------------------------------------------------------------------------------------------------------------------------------------------------------------------------------------------------------------------------------------------------------------------------------------------------------------------------------------------------------------------------------------------------------------------------------------------------------------------------------------------------------------------------------------------------------------------------------------------------------------------------------------------------------------------------------------------------------------------------------------------------------------------------------------------------------------------------------------------------------------------------------------------------------------------------------------------|-----------------------------------------------------------------------------------------------------------------------------------------------------------------------------------------------------------------------------------------------------------------------------------------------------------------------------------------------------------------------------------------------------------------------------------------------------------------------------------------------------------------------------------------------------------------------------------------------------------------------------------------------------------------------------------------------------------------------------------------------------------------------------------------------------------------------------------------------------------------------------------------------------------------------------------------------------------------------------------------------------------------------------------------------------------------------------------------------------------------------------------------------------------------------------------------------------------------------------------------------------------------------------------------------------------------------------------------------------|--------------------------------------------------------------------------------------------------------------------------------------------------------------------------------------------------------------------------------------------------------------------------------------------------------------------------------------------------------------------------------------------------------------------------------------------------------------------------------------------------------------------------------------------------------------------------------------------------------------------------------------------------------------------------------------------------------------------------------------------------------------------------------------------------------------------------------------------------------------------------------------------------------------------------------------------------------------------------------------------------------------------------------------------------------------------------------------------------------------------------------------------------------------------------------------------------------------------------------------------------------------------------------------------------------------------------------------------------------------------------|---------------------------------------------------------------------------------------------------------------------------------------------------------------------------------------------------------------------------------------------------------------------------------------------------------------------------------------------------------------------------------------------------------------------------------------------------------------------------------------------------------------------------------------------------------------------------------------------------------------------------------------------------------------------------------------------------------------------------------------------------------------------------------------------------------------------------------------------------------------------------------------------------------------------------------------------------------------------------------------------------------------------------------------------------------------------------------------------------------------------------------------------------------------------------------------------------------------------------------------------------------------------------------------------------------------------------------------------------------|
| an elephant and a rabbit<br>a bird and a lion<br>a dog and an elephant<br>a cat and a bird<br>a dog and a rabbit<br>a horse and a frog<br>a lion and a frog<br>a cat and a lion<br>a bird and a frog<br>a monkey and a mouse<br>a horse with a glasses<br>a bird with a crown<br>a turtle and a gray backpack<br>a rabbit and a orange backpack<br>a bear and a blue clock<br>a horse and a pink balloon<br>a horse and a blue backpack<br>a turtle and a pink balloon<br>a monkey and a blue chair<br>a lion and a black backpack<br>a monkey with a bow<br>an elephant and a yellow clock<br>a bird and a yellow car<br>a horse with a bow<br>a horse and a green suitcase<br>a mouse with a glasses<br>a lion and a white bench<br>an elephant and a pink backpack<br>a rabbit and a yellow suitcase<br>a rabbit and a gray clock<br>a rabbit with a bow<br>an elephant and a brown car<br>a cat with a crown<br>a monkey with a glasses<br>a pink crown and a purple bow<br>a green glasses and a black crown<br>a yellow backpack and a purple chair<br>a blue balloon and a blue bow<br>a yellow glasses and a brown bow<br>a green backpack and a yellow crown<br>a green bench and a red apple<br>a purple car and a pink apple<br>a black backpack and a pink balloon<br>a green backpack and a brown suitcase<br>a pink chair and a gray apple | a dog and a frog<br>a lion and a monkey<br>a dog and a horse<br>a dog and a monkey<br>a bird and a rabbit<br>a cat and a bear<br>a cat and a horse<br>a frog and a mouse<br>a horse and a rabbit<br>a lion and a horse<br>a cat and a frog<br>a bear with a glasses<br>a turtle and a yellow bowl<br>an elephant and a green balloon<br>a rabbit and a orange apple<br>a cat and a gray bench<br>a turtle and a yellow car<br>a frog with a bow<br>a cat and a red apple<br>a turtle and a blue chair<br>a dog with a crown<br>a mouse and a blue clock<br>a bird and a black bowl<br>a frog and a orange car<br>a bird and a yellow apple<br>an elephant with a crown<br>a horse and a brown bowl<br>a rabbit and a blue bowl<br>a lion and a orange suitcase<br>a horse and a blue bench<br>a bear and a pink apple<br>a mouse and a pink suitcase<br>a turtle with a glasses<br>a rabbit and a yellow car<br>a frog with a glasses<br>a blue clock and a blue apple<br>a purple chair and a red bow<br>a gray backpack and a green clock<br>a white bow and a white car<br>a red glasses and a red suitcase<br>a orange glasses and a pink clock<br>a gray backpack and a yellow glasses<br>a gray crown and a purple apple<br>a blue suitcase and a gray balloon<br>a green glasses and a black bench<br>a yellow suitcase and a yellow car | a bird and a mouse<br>a horse and a turtle<br>a turtle and a mouse<br>a lion and a mouse<br>an elephant and a turtle<br>a bird and a horse<br>a frog and a rabbit<br>a dog and a lion<br>a cat and a monkey<br>a bear and a horse<br>a monkey and a turtle<br>a monkey and a red car<br>a rabbit and a gray chair<br>a monkey and a orange apple<br>a bear with a crown<br>a lion with a glasses<br>an elephant with a glasses<br>a monkey and a brown bench<br>a dog with a bow<br>a horse and a green apple<br>a bird and a black bowl<br>a mouse and a black balloon<br>a dog and a pink bench<br>a monkey with a crown<br>a monkey and a orange suitcase<br>a monkey and a yellow clock<br>a lion and a brown balloon<br>an elephant and a orange apple<br>a dog and a green suitcase<br>a lion and a white chair<br>a lion and a pink bowl<br>a cat and a black suitcase<br>a cat with a bow<br>an elephant and a green bowl<br>a blue balloon and a orange bench<br>a yellow glasses and a black car<br>a blue crown and a red balloon<br>a orange bowl and a purple apple<br>a pink bow and a gray apple<br>a purple chair and a orange bowl<br>a green glasses and a yellow chair<br>a orange car and a red bench<br>a yellow glasses and a gray bowl<br>a white bow and a black clock<br>a green backpack and a purple bench | a monkey and a frog<br>a bird and a monkey<br>a cat and a turtle<br>a bear and a lion<br>a lion and an elephant<br>a rabbit and a mouse<br>a bear and a mouse<br>a lion and a rabbit<br>a bear and a rabbit<br>a bear and an elephant<br>a horse and an elephant<br>an elephant with a bow<br>a dog and a black apple<br>a lion and a red car<br>a frog and a red suitcase<br>a lion with a bow<br>a cat and a yellow balloon<br>a mouse and a red bench<br>a rabbit with a glasses<br>an elephant and a black chair<br>a dog and a gray clock<br>a horse and a white car<br>a turtle and a white bench<br>a frog with a crown<br>a cat and a blue backpack<br>a turtle and a orange suitcase<br>a turtle with a bow<br>a horse and a pink chair<br>an elephant and a green suitcase<br>a mouse and a red car<br>a rabbit with a crown<br>a frog and a black chair<br>a cat and a yellow car<br>a bird and a white clock<br>a bird with a glasses<br>a pink crown and a red chair<br>a orange backpack and a purple car<br>a gray suitcase and a black bowl<br>a brown chair and a white bench<br>a gray crown and a white clock<br>a orange suitcase and a brown bench<br>a white glasses and a gray apple<br>a red suitcase and a blue apple<br>a white suitcase and a white chair<br>a red crown and a black bowl<br>a black crown and a red car | a horse and a monkey<br>a bear and a frog<br>a dog and a mouse<br>a bird and an elephant<br>a cat and a rabbit<br>a bird and a bear<br>a monkey and a rabbit<br>an elephant and a frog<br>a turtle and a rabbit<br>a horse and a mouse<br>a cat and a mouse<br>a frog and a purple balloon<br>a rabbit and a white bench<br>a lion with a crown<br>a monkey and a green balloon<br>a bear and a red balloon<br>a horse and a yellow clock<br>a bird and a brown balloon<br>a bear and a gray bench<br>a mouse and a purple chair<br>a dog and a purple car<br>a mouse and a pink apple<br>a bird with a bow<br>a frog and a green bowl<br>a turtle and a pink apple<br>a lion and a gray apple<br>a dog and a brown backpack<br>an elephant and a green bench<br>a horse with a crown<br>a cat and a black chair<br>a mouse and a purple bowl<br>a frog and a green clock<br>a frog and a yellow backpack<br>a cat and a green clock<br>a dog and a blue balloon<br>a orange chair and a blue clock<br>a white balloon and a white apple<br>a brown balloon and a pink car<br>a purple crown and a blue suitcase<br>a black car and a white clock<br>a white glasses and a orange balloon<br>a gray suitcase and a brown bow<br>a red backpack and a yellow bowl<br>a purple crown and a blue bench<br>a green chair and a purple car<br>a green balloon and a pink bowl | a bird and a turtle<br>a bear and a turtle<br>a cat and an elephant<br>a lion and a turtle<br>a dog and a bear<br>a bear and a monkey<br>a cat and a dog<br>a frog and a turtle<br>an elephant and a monkey<br>a dog and a turtle<br>an elephant and a mouse<br>a mouse with a bow<br>a lion and a yellow clock<br>a bird and a purple bench<br>a cat with a glasses<br>a bird and a black backpack<br>a dog with a glasses<br>a monkey and a yellow backpack<br>a turtle and a blue clock<br>a bear and a white car<br>a dog and a gray bowl<br>a bear and a orange backpack<br>a turtle with a crown<br>a frog and a pink bench<br>a dog and a pink bench<br>a mouse with a crown<br>a cat and a purple bowl<br>a rabbit and a white balloon<br>a bear with a bow<br>a bear and a red suitcase<br>a frog and a black apple<br>a bear and a white chair<br>a bird and a black suitcase<br>a bear and a purple bowl<br>a mouse and a brown backpack<br>a purple bowl and a black bench<br>a brown suitcase and a black clock<br>a black backpack and a green bow<br>a yellow bow and a orange bench<br>a brown bowl and a green clock<br>a yellow backpack and a gray apple<br>a white car and a black bowl<br>a red bench and a yellow clock<br>a yellow bow and a pink bowl<br>a white chair and a gray balloon<br>a purple balloon and a white clock |
|----------------------------------------------------------------------------------------------------------------------------------------------------------------------------------------------------------------------------------------------------------------------------------------------------------------------------------------------------------------------------------------------------------------------------------------------------------------------------------------------------------------------------------------------------------------------------------------------------------------------------------------------------------------------------------------------------------------------------------------------------------------------------------------------------------------------------------------------------------------------------------------------------------------------------------------------------------------------------------------------------------------------------------------------------------------------------------------------------------------------------------------------------------------------------------------------------------------------------------------------------------------------------------------------------------------------------------------------------------|-------------------------------------------------------------------------------------------------------------------------------------------------------------------------------------------------------------------------------------------------------------------------------------------------------------------------------------------------------------------------------------------------------------------------------------------------------------------------------------------------------------------------------------------------------------------------------------------------------------------------------------------------------------------------------------------------------------------------------------------------------------------------------------------------------------------------------------------------------------------------------------------------------------------------------------------------------------------------------------------------------------------------------------------------------------------------------------------------------------------------------------------------------------------------------------------------------------------------------------------------------------------------------------------------------------------------------------------------|---------------------------------------------------------------------------------------------------------------------------------------------------------------------------------------------------------------------------------------------------------------------------------------------------------------------------------------------------------------------------------------------------------------------------------------------------------------------------------------------------------------------------------------------------------------------------------------------------------------------------------------------------------------------------------------------------------------------------------------------------------------------------------------------------------------------------------------------------------------------------------------------------------------------------------------------------------------------------------------------------------------------------------------------------------------------------------------------------------------------------------------------------------------------------------------------------------------------------------------------------------------------------------------------------------------------------------------|-----------------------------------------------------------------------------------------------------------------------------------------------------------------------------------------------------------------------------------------------------------------------------------------------------------------------------------------------------------------------------------------------------------------------------------------------------------------------------------------------------------------------------------------------------------------------------------------------------------------------------------------------------------------------------------------------------------------------------------------------------------------------------------------------------------------------------------------------------------------------------------------------------------------------------------------------------------------------------------------------------------------------------------------------------------------------------------------------------------------------------------------------------------------------------------------------------------------------------------------------------------------------------------------------------------------------------------------------------|--------------------------------------------------------------------------------------------------------------------------------------------------------------------------------------------------------------------------------------------------------------------------------------------------------------------------------------------------------------------------------------------------------------------------------------------------------------------------------------------------------------------------------------------------------------------------------------------------------------------------------------------------------------------------------------------------------------------------------------------------------------------------------------------------------------------------------------------------------------------------------------------------------------------------------------------------------------------------------------------------------------------------------------------------------------------------------------------------------------------------------------------------------------------------------------------------------------------------------------------------------------------------------------------------------------------------------------------------------------------------|---------------------------------------------------------------------------------------------------------------------------------------------------------------------------------------------------------------------------------------------------------------------------------------------------------------------------------------------------------------------------------------------------------------------------------------------------------------------------------------------------------------------------------------------------------------------------------------------------------------------------------------------------------------------------------------------------------------------------------------------------------------------------------------------------------------------------------------------------------------------------------------------------------------------------------------------------------------------------------------------------------------------------------------------------------------------------------------------------------------------------------------------------------------------------------------------------------------------------------------------------------------------------------------------------------------------------------------------------------|

Table 2. Prompt dataset for simple cases.

|                                                                                                                                                                                                                                                                                                                                                                                                                                                                                                                                                                                                                                   |                                                                                                                                                                                                                                                                                                                                                                                                                                                                                                                                                                                                                |                                                                                                                                                                                                                                                                                                                                                                                                                                                                                                                                                                                                                      |                                                                                                                                                                                                                                                                                                                                                                                                                                                                                                                                                                                                                                   |                                                                                                                                                                                                                                                                                                                                                                                                                                                                                                                                                                                                                                   |
|-----------------------------------------------------------------------------------------------------------------------------------------------------------------------------------------------------------------------------------------------------------------------------------------------------------------------------------------------------------------------------------------------------------------------------------------------------------------------------------------------------------------------------------------------------------------------------------------------------------------------------------|----------------------------------------------------------------------------------------------------------------------------------------------------------------------------------------------------------------------------------------------------------------------------------------------------------------------------------------------------------------------------------------------------------------------------------------------------------------------------------------------------------------------------------------------------------------------------------------------------------------|----------------------------------------------------------------------------------------------------------------------------------------------------------------------------------------------------------------------------------------------------------------------------------------------------------------------------------------------------------------------------------------------------------------------------------------------------------------------------------------------------------------------------------------------------------------------------------------------------------------------|-----------------------------------------------------------------------------------------------------------------------------------------------------------------------------------------------------------------------------------------------------------------------------------------------------------------------------------------------------------------------------------------------------------------------------------------------------------------------------------------------------------------------------------------------------------------------------------------------------------------------------------|-----------------------------------------------------------------------------------------------------------------------------------------------------------------------------------------------------------------------------------------------------------------------------------------------------------------------------------------------------------------------------------------------------------------------------------------------------------------------------------------------------------------------------------------------------------------------------------------------------------------------------------|
| an elephant under a rabbit<br>a bird on a monkey<br>a bird above an elephant<br>a cat under a rabbit<br>a cat on a horse<br>a horse under a rabbit<br>a monkey under a turtle<br>a turtle under a yellow bowl<br>a monkey above a green bowl<br>a turtle below a blue clock<br>a turtle on a white bench<br>a monkey on an orange suitcase<br>a rabbit under a blue bowl<br>a frog on a green clock<br>a purple bowl on a black bench<br>a purple crown on a blue suitcase<br>a brown bowl below a green clock<br>a green bench under a red apple<br>a red suitcase under a blue apple<br>a green backpack under a brown suitcase | a dog under a frog<br>a dog on an elephant<br>a lion under a turtle<br>a dog on a bear<br>a frog under a mouse<br>a monkey below a monkey<br>a cat above a mouse<br>a rabbit on a gray chair<br>a bear below a blue clock<br>a monkey on a blue chair<br>a bird above a yellow car<br>a mouse below a crown<br>a dog above a green suitcase<br>a pink crown under a purple bow<br>an orange backpack on a purple car<br>a yellow bow above an orange bench<br>a green backpack under a yellow crown<br>a gray suitcase under a brown bow<br>a red backpack under a yellow bowl<br>a white bow on a black clock | a monkey under a frog<br>a cat on an elephant<br>a dog below a bird<br>a cat above a bear<br>a dog on a lion<br>an elephant below a monkey<br>an elephant under a mouse<br>a rabbit under a white bench<br>a bear under a crown<br>a bear below an orange backpack<br>a monkey under a crown<br>a horse under a brown bowl<br>a cat under a black chair<br>a blue clock under a blue apple<br>a brown suitcase below a black clock<br>a pink bow on a gray apple<br>a purple chair under an orange bowl<br>a white car under a black bowl<br>a black backpack below a pink balloon<br>a red crown under a black bowl | a bird on a turtle<br>a dog under a monkey<br>a bird above a rabbit<br>a bird on a horse<br>an elephant under a frog<br>a bird above a frog<br>a monkey on a red car<br>a lion below a yellow clock<br>a mouse under a red bench<br>a bird on a green chair<br>a cat above a blue backpack<br>a monkey below a yellow clock<br>a lion under a pink bowl<br>a blue balloon on an orange bench<br>a gray backpack under a green clock<br>a gray crown below a white clock<br>an orange suitcase under a brown bench<br>a purple car under a pink apple<br>a blue suitcase below a gray balloon<br>a yellow suitcase on a yellow car | a bird above a lion<br>a lion under a mouse<br>an elephant under a turtle<br>a bear under a monkey<br>a cat on a lion<br>a cat above a frog<br>a frog below a purple balloon<br>an elephant below a green balloon<br>a bear under a gray bench<br>a mouse below a black balloon<br>a dog on an orange chair<br>a lion on a white bench<br>a frog on a black chair<br>a pink crown under a red chair<br>a brown balloon above a pink car<br>a black car under a white clock<br>a yellow backpack under a gray apple<br>a gray crown under a purple apple<br>a white suitcase on a white chair<br>a green balloon above a pink bowl |
|-----------------------------------------------------------------------------------------------------------------------------------------------------------------------------------------------------------------------------------------------------------------------------------------------------------------------------------------------------------------------------------------------------------------------------------------------------------------------------------------------------------------------------------------------------------------------------------------------------------------------------------|----------------------------------------------------------------------------------------------------------------------------------------------------------------------------------------------------------------------------------------------------------------------------------------------------------------------------------------------------------------------------------------------------------------------------------------------------------------------------------------------------------------------------------------------------------------------------------------------------------------|----------------------------------------------------------------------------------------------------------------------------------------------------------------------------------------------------------------------------------------------------------------------------------------------------------------------------------------------------------------------------------------------------------------------------------------------------------------------------------------------------------------------------------------------------------------------------------------------------------------------|-----------------------------------------------------------------------------------------------------------------------------------------------------------------------------------------------------------------------------------------------------------------------------------------------------------------------------------------------------------------------------------------------------------------------------------------------------------------------------------------------------------------------------------------------------------------------------------------------------------------------------------|-----------------------------------------------------------------------------------------------------------------------------------------------------------------------------------------------------------------------------------------------------------------------------------------------------------------------------------------------------------------------------------------------------------------------------------------------------------------------------------------------------------------------------------------------------------------------------------------------------------------------------------|

Table 3. Prompt dataset for complex cases.

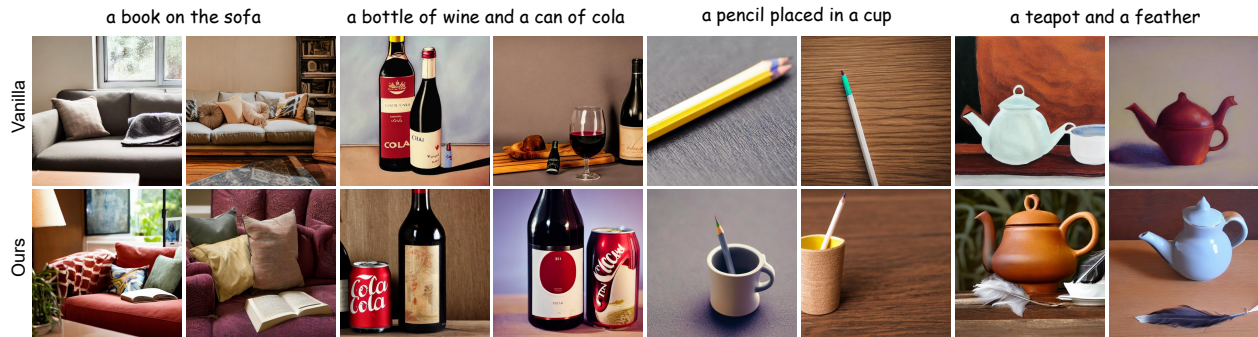

Figure 4. Outputs of Vanilla settings and our method for SD V-1.4.



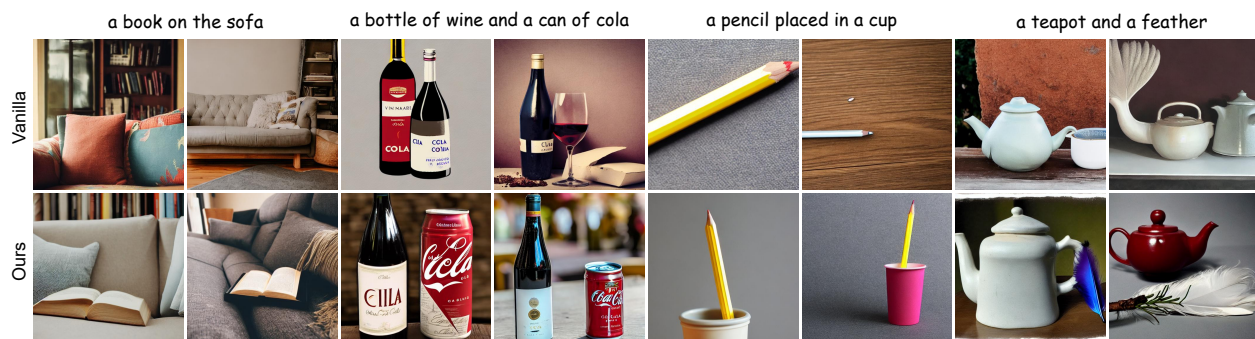

Figure 5. Outputs of Vanilla settings and our method for SD V-1.5.

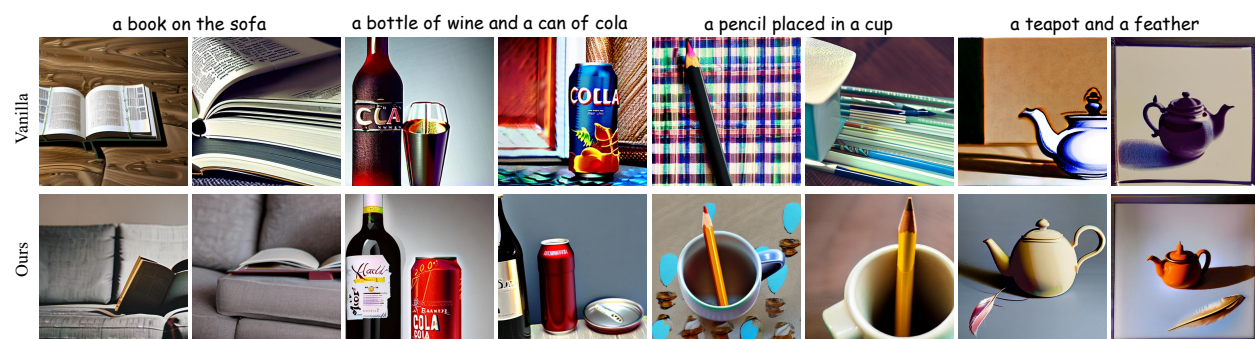

Figure 6. Outputs of Vanilla settings and our method for SD V-2.0.

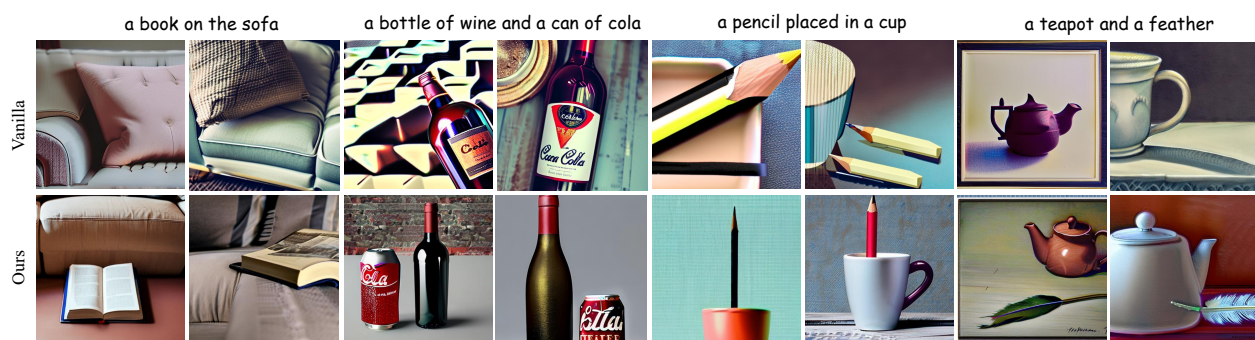

Figure 7. Outputs of Vanilla settings and our method for SD V-2.1.
